# Supplementary material for: Mosquito Innate Immunity
Source: PubMed Central journal article supplement (PMC6165528; doi:10.3390/insects9030095), 2018-08-08
Supplement: insects-09-00095-s001.pdf [file insects-09-00095-s001.pdf]

## Supplementary figure 1: PRISMA 2009 Flow Diagram

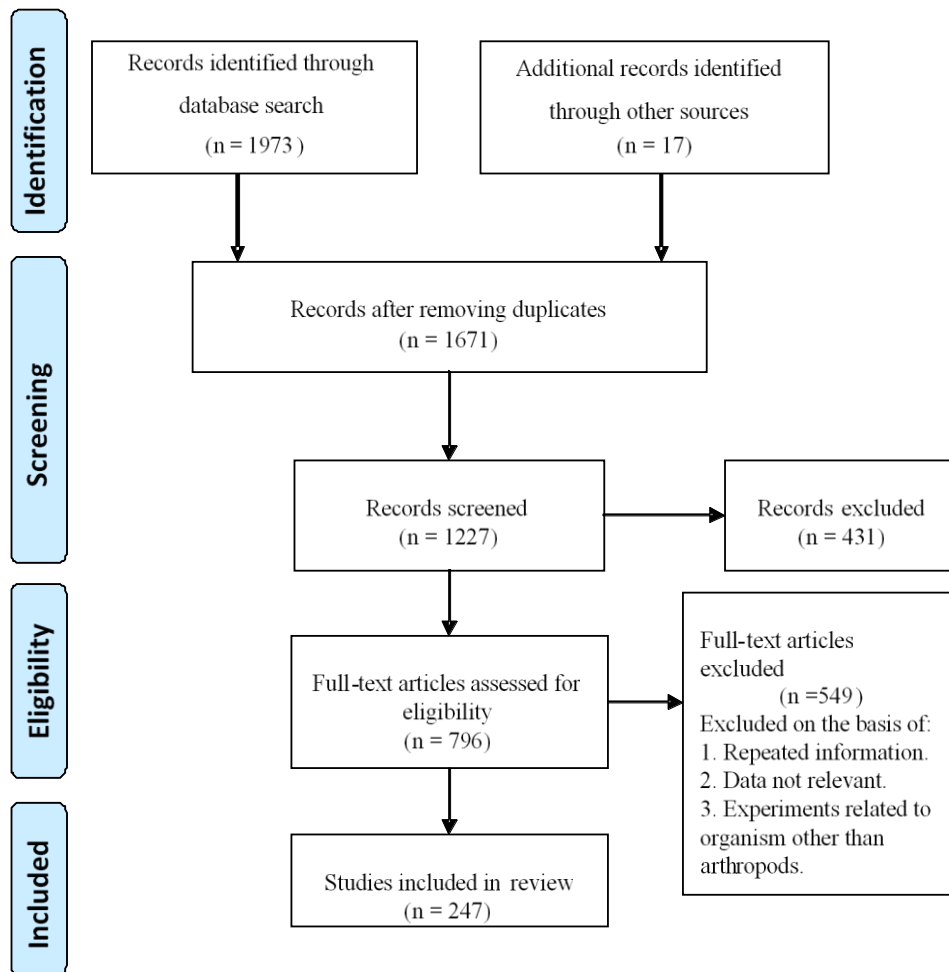

From: Moher D, Liberati A, Tetzlaff J, Altman DG, The PRISMA Group (2009). *Preferred Reporting Items for Systematic Reviews and Meta-Analyses: The PRISMA Statement*. PLoS Med 6(7): e1000097.

doi:10.1371/journal.pmed1000097

For more information, visit [www.prisma-statement.org](http://www.prisma-statement.org).
